# Supplementary material
Source: PubMed Central journal article supplement (PMC5291034)
Supplement: supp_pp.16.01514_PP2016-01514R1_Supplemental_Material.pdf [file supp_pp.16.01514_PP2016-01514R1_Supplemental_Material.pdf]

## **SUPPLEMENTAL DATA**

### **Constitutive *AtSAUR19* expression confers auxin-independent hypocotyl elongation in *Arabidopsis* and tomato**

Angela K. Spartz<sup>1</sup>, Vai S. Lor<sup>1</sup>, Hong Ren<sup>1</sup>, Neil E. Olszewski<sup>1</sup>, Nathan D. Miller<sup>2</sup>, Guosheng Wu<sup>2</sup>, Edgar P. Spalding<sup>2</sup>, and William M. Gray<sup>1\*</sup>

**Supplemental Table 1. Primers used in this study**

|                    |                                                                            |
|--------------------|----------------------------------------------------------------------------|
| <b>qPCR</b>        |                                                                            |
| SAUR19-UTR-F       | cttcaagagcttcataataattcaaactt                                              |
| SAUR19-UTR-R       | gaaggaaaaaatgttgatcatct                                                    |
| SAUR9-F232         | TCAACACCGAAGTCGCTATG                                                       |
| SAUR9-R315         | TCGTGCTCGAAACCAAACCTC                                                      |
| SAUR20-UTR-F       | aacttgaatcttttcatacatcttcag                                                |
| SAUR20-UTR-R       | taactaggaagaaaaatgttggtca                                                  |
| SAUR21-UTR-F       | taagcttcaaaaaccttttcgtaca                                                  |
| SAUR21-UTR-R       | ccaaatgtcggatcatcatgaTCA                                                   |
| SAUR23-UTR-F       | tttcagacaaaagaaATGGCTTTGG                                                  |
| SAUR23-UTR-R       | acaaggaaacaactctatctctaact                                                 |
| ACT7-F             | GAGAAGATGACTCAGATC                                                         |
| ACT7-R             | ATCCTTCCTGATATCGAC                                                         |
|                    |                                                                            |
| <b>SIPP2C cDNA</b> |                                                                            |
| SIPP2C38-F         | CAC CAT GGT GAC AAG TAC ATG GAA AAA G                                      |
| SIPP2C38-R         | TCA AGG GCC TCC TCC GCC TC                                                 |
| SIPP2C42-F         | CAC CAT GAA TTT CCT TCC AAG ATG TTT G                                      |
| SIPP2C42-R         | TCA GTG TTC TAA AGC ACT CCG                                                |
| SIPP2C46-F         | CACCATGACATCTGGATTGATGAACTTC                                               |
| SIPP2C46-R         | TTATGTTGGGGTAGTCTTTGTAGG                                                   |
| attb1 SIPP2C60-F   | GGG GAC AAG TTT GTA CAA AAA AGC AGG CTG CAT GTT ATC AAG GCT GAT AAA TTT CC |
| attb1 SIPP2C60-R   | GGG GAC CAC TTT GTA CAA GAA AGC TGG GTC TTA AGT GGT ACC GAG TTC TAT GGG    |

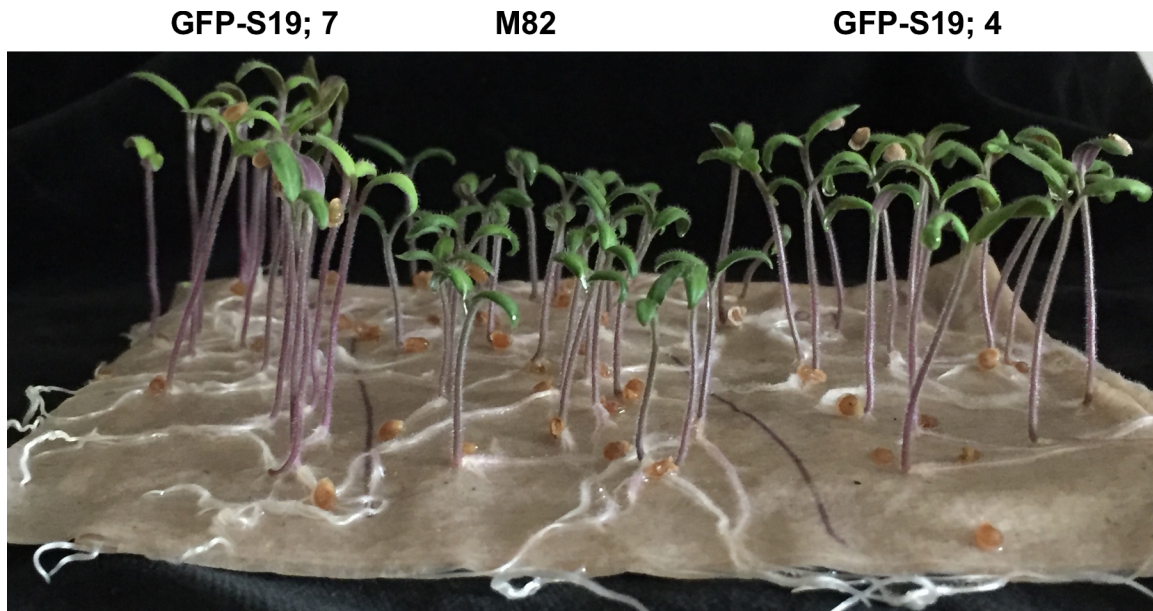

**Supplemental Figure 1. 35S:GFP-AtSAUR19 expression confers a long hypocotyl phenotype.** Wild-type M82 and two GFP-AtSAUR19 transgenic lines were grown for 8 days under long-day (16:8) lighting.

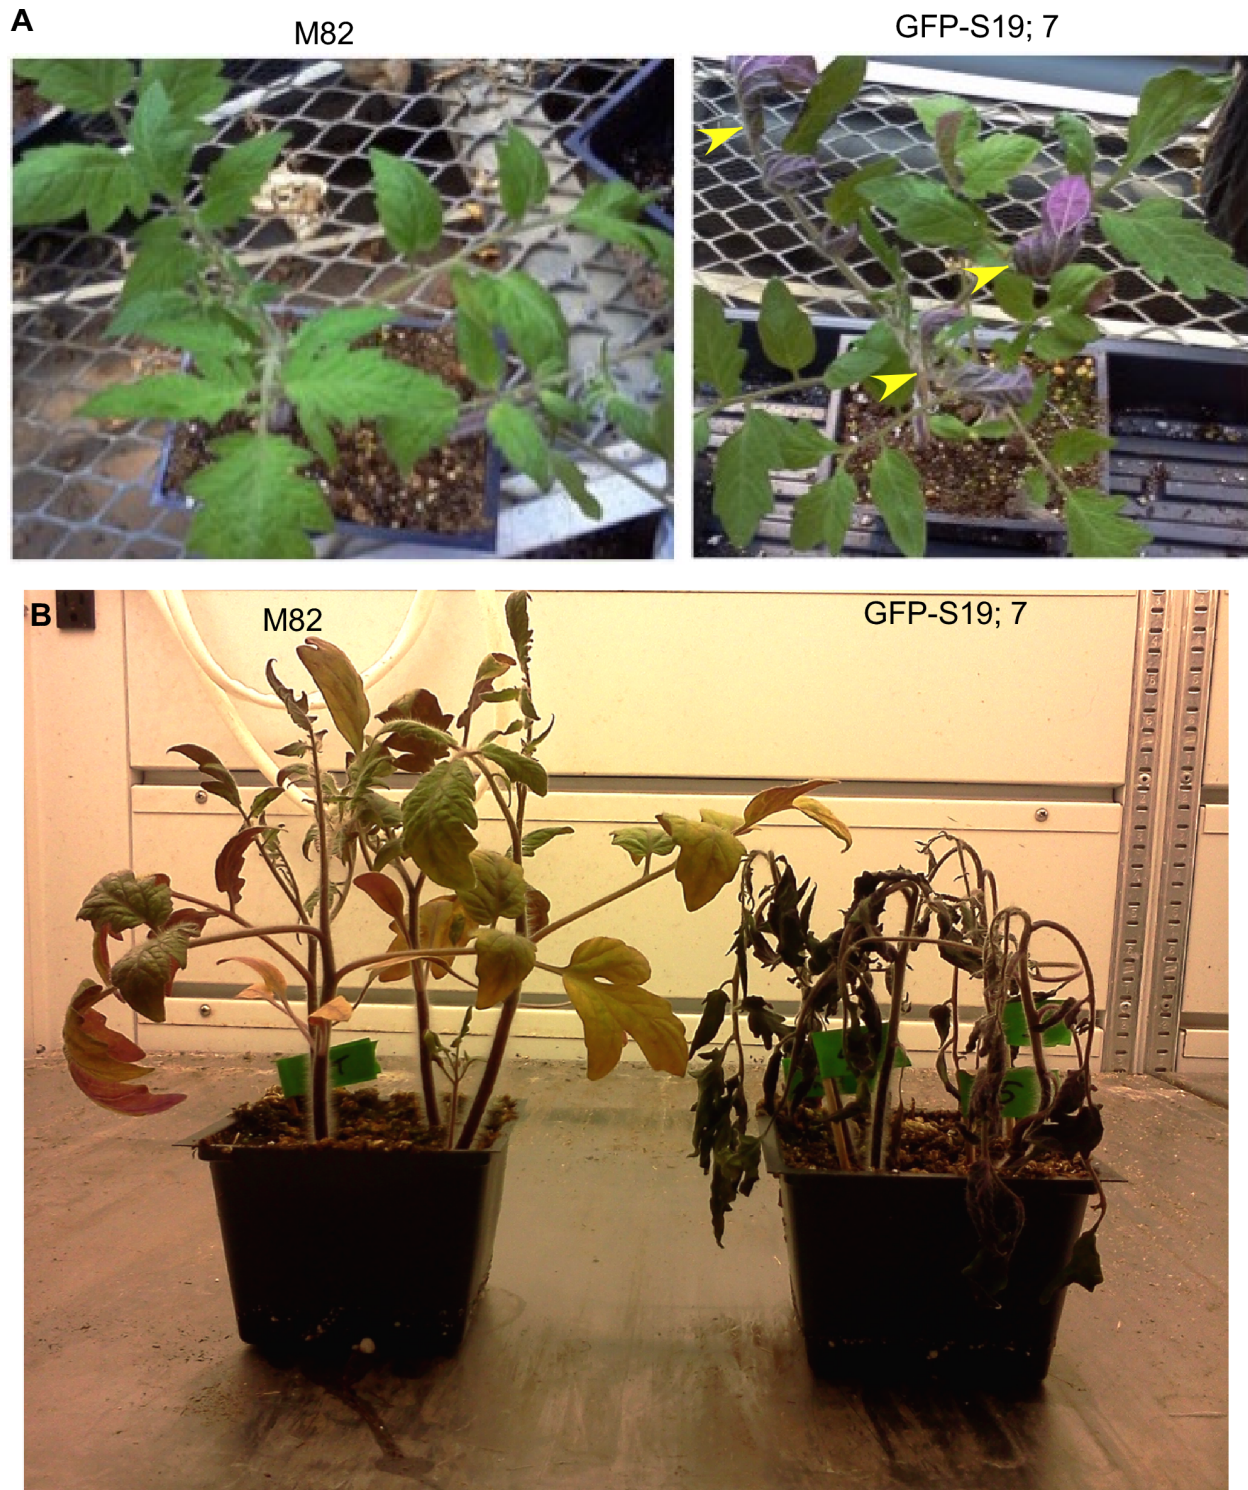

**Supplemental Figure 2. 35S:GFP-AtAUR19 expression confers drought hypersensitivity.** **A)** M82 and GFP-AtSAUR19 plants were removed from the growth chamber (70% relative humidity) and incubated at ambient humidity for 1 h. Arrowheads indicate leaf curling upon exposure to lower humidity. **B)** M82 and GFP-AtSAUR19 plants after withholding water for several days.



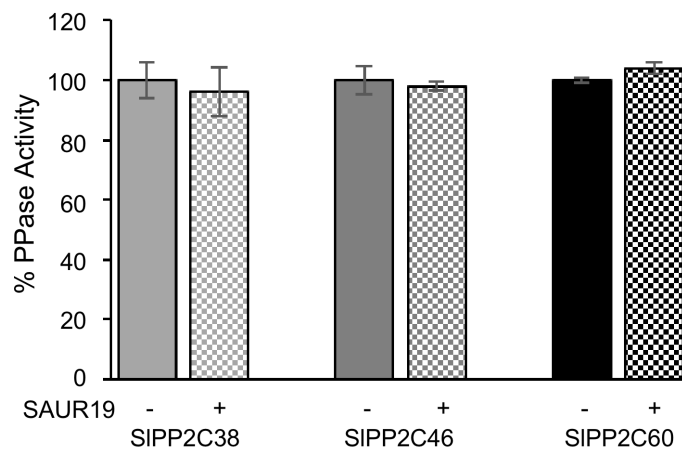

**Supplemental Figure 3. SIPP2C38, 46, or 60 pNPP phosphatase assays with AtSAUR19.** 6xHis-SIPP2C.D proteins were purified from *E. coli* and tested in phosphatase assays employing pNPP. Values indicate the mean relative activities  $\pm$  SD of three assays.

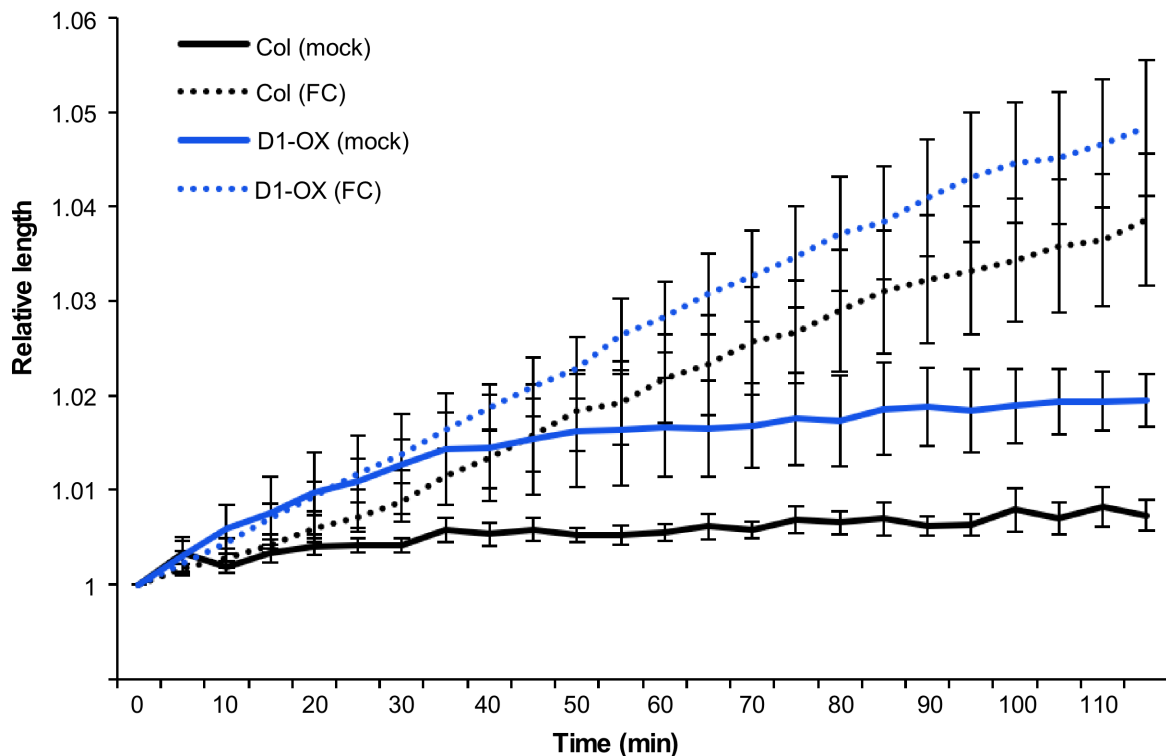

**Supplemental Figure 4. Fusicoccin promotes elongation of 35S:AtPP2C.D1 hypocotyl segments.** Hypocotyl segments from etiolated Col or 35S:PP2C.D1 (D1-OX) seedlings were incubated for 30 min on auxin depletion medium and then transferred to plates containing 1  $\mu$ M fusicoccin (FC). Data points represent the mean relative segment length  $\pm$  SE from 3 independent assays, each containing 4-7 hypocotyls/genotype/treatment.

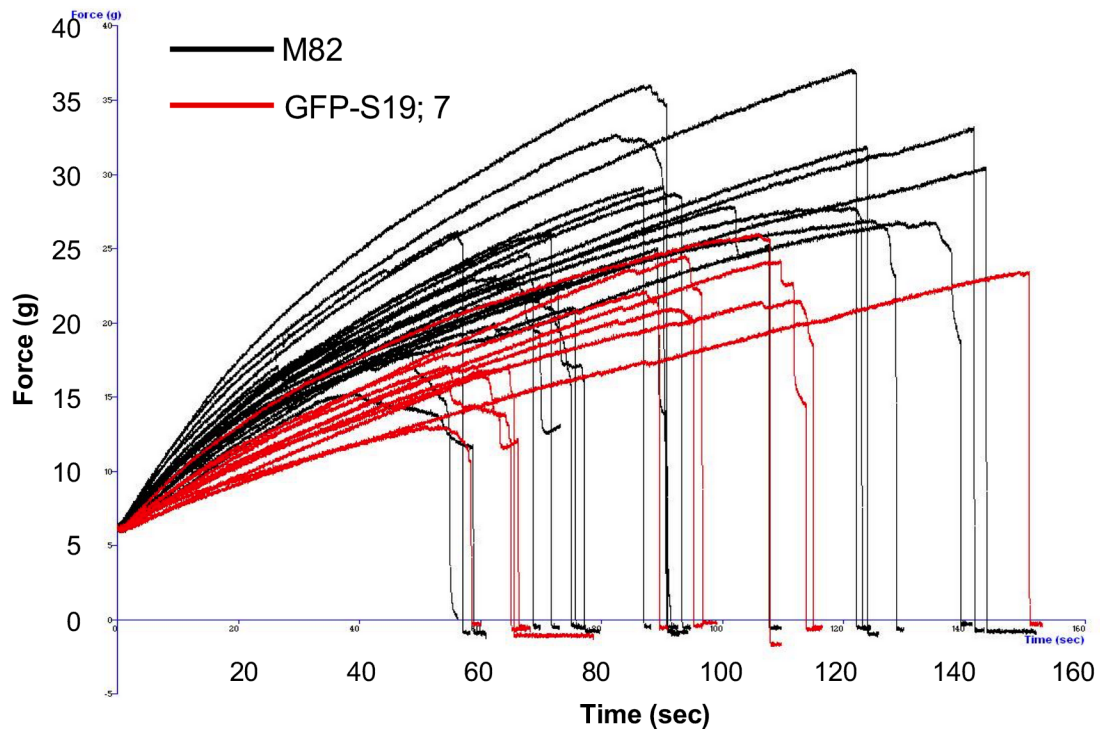

**Supplemental Figure 5. Raw TA.XTplus data.** Each line represents the force curve obtained from an individual M82 (black) or GFP-AtSAUR19 (red) hypocotyl.
